# Supplementary material for: Severity of Prior COVID-19 Infection is Associated with Postoperative Outcomes Following Major Inpatient Surgery
Source: PubMed Central journal article supplement — medRxiv. 2023 Apr 17:2023.04.12.23288412. Preprint. [Version 1] doi: 10.1101/2023.04.12.23288412 (PMC10153306; doi:10.1101/2023.04.12.23288412), 2023-04-17
Supplement: NIHPP2023.04.12.23288412v1-supplement-1.pdf [file NIHPP2023.04.12.23288412v1-supplement-1.pdf]

411 **SUPPLEMENTARY DATA**

412

413 **Supplemental Table 1: Surgical Procedures and associated risk**

414

| <b>Procedure Name</b>               | <b>Surgery N=387,030 (%)</b> | <b>SNOMED Code</b> |
|-------------------------------------|------------------------------|--------------------|
| Low Risk                            |                              |                    |
| <b>Hip Arthroplasty</b>             | 5480 (1.4%)                  | 52734007           |
| <b>Knee Arthroplasty</b>            | 6034 (1.6%)                  | 609588000          |
| <b>Laminectomy</b>                  | 44462 (11%)                  | 387731002          |
| <b>Mastectomy</b>                   | 75714 (20%)                  | 69031006           |
| <b>Prostatectomy</b>                | 17059 (4.4%)                 | 90470006           |
| Medium Risk                         |                              |                    |
| <b>Aortic Aneurysm Repair</b>       | 4881 (1.3%)                  | 233370007          |
| <b>Colectomy</b>                    | 46059 (12%)                  | 23968004           |
| <b>Craniectomy</b>                  | 29201 (7.5%)                 | 36910002           |
| <b>Gastrectomy</b>                  | 7903 (2.0%)                  | 53442002           |
| <b>Lung Excision</b>                | 17353 (4.5%)                 | 119746007          |
| <b>Spinal Arthrodesis</b>           | 78947 (20%)                  | 55705006           |
| High Risk                           |                              |                    |
| <b>Coronary Artery Bypass Graft</b> | 37492 (9.7%)                 | 232717009          |
| <b>Esophagectomy</b>                | 1538 (0.4%)                  | 45900003           |
| <b>Hepatectomy</b>                  | 8495 (2.2%)                  | 107963000          |
| <b>Pancreatectomy</b>               | 6412 (1.7%)                  | 33149006           |

415

416

417

418 **Supplemental Table 2: Patient comorbidities**

419

| <b>Preoperative Comorbidities</b>     | <b>SNOMED Codes</b> |
|---------------------------------------|---------------------|
| Chronic Kidney Disease                | 709044004           |
| Chronic Obstructive Pulmonary Disease | 13645005            |
| Coronary Artery Disease               | 53741008            |
| Depression                            | 370143000           |
| Diabetes                              | 73211009            |
| Gastroesophageal Reflux Disease       | 235595009           |
| Heart Failure                         | 84114007            |
| Hypertension                          | 59621000            |
| Liver Disease                         | 328383001           |
| Obesity                               | 414916001           |

420

421

422 **Supplemental Table 3: Postoperative Complications**

423

| <b>Postoperative Complications</b> | <b>SNOMED Codes</b> |
|------------------------------------|---------------------|
| Acute Myocardial Infarction        | 57054005            |
| Cardiac Arrhythmia                 | 698247007           |
| Deep Vein Thrombosis               | 128053003           |
| Pneumonia                          | 233604007           |
| Pulmonary Embolism                 | 59282003            |
| Renal Failure                      | 42399005            |
| Respiratory Failure                | 409622000           |
| Sepsis                             | 91302008            |
| Urinary Tract Infection            | 68566005            |

424

425

426

427 **Supplemental Table 4. Comparison of 30-day postoperative adverse events based**  
 428 **on surgical timing relative to COVID-19**  
 429

| Outcomes                    | No History of COVID-19 (N = 352,947) | 0–4 Weeks Post-COVID-19 (N = 7,425) | 4–8 Weeks Post-COVID-19 (N = 3,936) | 8–12 Weeks Post COVID-19 (N = 2,604) | 12+ Weeks Post COVID-19 (N = 23,389) | P value |
|-----------------------------|--------------------------------------|-------------------------------------|-------------------------------------|--------------------------------------|--------------------------------------|---------|
| Mortality                   | 4791 (1.4%)                          | 246 (3.3%)                          | 83 (2.1%)                           | 47 (1.8%)                            | 290 (1.2%)                           | <0.001  |
| LOS                         | 2 (0, 6)                             | 4 (1, 8)                            | 2 (0, 6)                            | 3 (0, 6)                             | 2 (0, 5)                             | <0.001  |
| Hospital Readmission        | 38175 (11%)                          | 848 (11%)                           | 458 (12%)                           | 318 (12%)                            | 2622 (11%)                           | 0.057   |
| Any Non-Fatal Complication  | 73555 (21%)                          | 1914 (26%)                          | 890 (23%)                           | 625 (24%)                            | 4828 (21%)                           | <0.001  |
| Acute Myocardial Infarction | 9089 (2.6%)                          | 271 (3.6%)                          | 100 (2.5%)                          | 57 (2.2%)                            | 592 (2.5%)                           | <0.001  |
| Cardiac Arrhythmia          | 34326 (9.8%)                         | 803 (11%)                           | 409 (10%)                           | 286 (11%)                            | 2254 (9.6%)                          | 0.006   |
| Deep Vein Thrombosis        | 4648 (1.3%)                          | 142 (1.9%)                          | 57 (1.4%)                           | 46 (1.8%)                            | 287 (1.2%)                           | <0.001  |
| Pneumonia                   | 9623 (2.8%)                          | 348 (4.7%)                          | 131 (3.3%)                          | 95 (3.6%)                            | 519 (2.2%)                           | <0.001  |
| Pulmonary Embolism          | 4296 (1.2%)                          | 137 (1.8%)                          | 58 (1.5%)                           | 35 (1.3%)                            | 289 (1.2%)                           | <0.001  |
| Renal Failure               | 22488 (6.4%)                         | 654 (8.8%)                          | 288 (7.3%)                          | 204 (7.8%)                           | 1446 (6.2%)                          | <0.001  |
| Respiratory Failure         | 18862 (5.4%)                         | 655 (8.8%)                          | 197 (5.0%)                          | 164 (6.3%)                           | 1001 (4.3%)                          | <0.001  |
| Sepsis                      | 10244 (2.9%)                         | 346 (4.7%)                          | 134 (3.4%)                          | 95 (3.6%)                            | 613 (2.6%)                           | <0.001  |
| Urinary Tract Infection     | 9662 (2.8%)                          | 208 (2.8%)                          | 110 (2.8%)                          | 88 (3.4%)                            | 639 (2.7%)                           | 0.43    |

430  
431

432 **Supplemental Table 5.** Multivariable regression assessing the impact of timing of  
 433 infection relative to surgery on risk on composite and specific 30-day postoperative  
 434 adverse outcomes. All models adjusted for age, sex, race and ethnicity, smoking status,  
 435 and relative risk of surgery.  
 436

|                                               | <b>0–4 weeks<br/>(N = 7,425)</b> |             | <b>4–8 weeks<br/>(N = 3,936)</b> |             | <b>8–12 weeks<br/>(N = 2,604)</b> |             | <b>12+ Weeks<br/>(N = 23,389)</b> |             |
|-----------------------------------------------|----------------------------------|-------------|----------------------------------|-------------|-----------------------------------|-------------|-----------------------------------|-------------|
| <b>Composite 30-day postoperative outcome</b> | 1.27                             | [1.20-1.35] | 1.14                             | [1.05-1.24] | 1.16                              | [1.05-1.28] | 1.01                              | [0.98-1.05] |
| <b>Mortality</b>                              | 2.34                             | [2.05-2.67] | 1.57                             | [1.25-1.95] | 1.22                              | [0.90-1.62] | 0.92                              | [0.81-1.03] |
| <b>Composite Non-fatal Complications</b>      | 1.22                             | [1.15-1.29] | 1.10                             | [1.01-1.20] | 1.14                              | [1.03-1.26] | 1.01                              | [0.98-1.05] |
| <b>Hospital Readmission</b>                   | 0.99                             | [0.92-1.07] | 1.02                             | [0.92-1.13] | 1.06                              | [0.94-1.19] | 1.01                              | [0.97-1.05] |
| <b>Myocardial Infarction</b>                  | 1.13                             | [0.99-1.29] | 0.93                             | [0.75-1.14] | 0.73                              | [0.55-0.96] | 1.06                              | [0.96-1.15] |
| <b>Cardiac Arrhythmia</b>                     | 1.04                             | [0.96-1.13] | 1.11                             | [1.00-1.24] | 1.15                              | [1.00-1.31] | 1.09                              | [1.04-1.15] |
| <b>Deep Vein Thrombosis</b>                   | 1.33                             | [1.12-1.57] | 1.04                             | [0.79-1.34] | 1.21                              | [0.89-1.61] | 0.88                              | [0.78-0.99] |
| <b>Pneumonia</b>                              | 1.60                             | [1.43-1.79] | 1.21                             | [1.01-1.44] | 1.24                              | [1.00-1.52] | 0.81                              | [0.74-0.88] |
| <b>Pulmonary Embolism</b>                     | 1.44                             | [1.20-1.70] | 1.17                             | [0.89-1.50] | 1.01                              | [0.71-1.39] | 0.96                              | [0.85-1.08] |
| <b>Renal Failure</b>                          | 1.28                             | [1.17-1.39] | 1.13                             | [0.99-1.27] | 1.12                              | [0.96-1.30] | 0.94                              | [0.89-1.00] |
| <b>Respiratory Failure</b>                    | 1.53                             | [1.40-1.66] | 0.90                             | [0.77-1.04] | 1.09                              | [0.92-1.28] | 0.80                              | [0.74-0.85] |
| <b>Sepsis</b>                                 | 1.52                             | [1.36-1.69] | 1.14                             | [0.95-1.36] | 1.15                              | [0.92-1.40] | 0.87                              | [0.80-0.94] |
| <b>Urinary Tract Infection</b>                | 1.01                             | [0.87-1.15] | 1.02                             | [0.84-1.23] | 1.17                              | [0.94-1.44] | 0.97                              | [0.90-1.05] |

437

438

439 **Supplemental Table 6. Comparison of specific 30-day postoperative adverse**  
 440 **events based on COVID-19 Severity.**  
 441

| Postoperative Complications | No History of COVID-19 (N = 351,857) | Mild Outpatient WHO Severity 1–3 (N = 31,677) | Moderate Hospitalized without invasive ventilation WHO Severity 4–6 (N= 5,009) | Severe Hospitalized with invasive ventilation or ECMO WHO Severity 7–9 (N= 655) | P value |
|-----------------------------|--------------------------------------|-----------------------------------------------|--------------------------------------------------------------------------------|---------------------------------------------------------------------------------|---------|
| Mortality                   | 4791 (1.4%)                          | 403 (1.3%)                                    | 169 (3.4%)                                                                     | 94 (14%)                                                                        | <0.001  |
| LOS                         | 2 (0, 6)                             | 2 (0, 5)                                      | 4 (1, 9)                                                                       | 12 (4, 29)                                                                      | <0.001  |
| Hospital Readmission        | 38175 (11%)                          | 3293 (10%)                                    | 832 (17%)                                                                      | 121 (18%)                                                                       | <0.001  |
| Any Non-Fatal Complication  | 73555 (21%)                          | 6110 (19%)                                    | 1746 (35%)                                                                     | 396 (60%)                                                                       | <0.001  |
| Acute Myocardial Infarction | 9089 (2.6%)                          | 723 (2.3%)                                    | 243 (4.9%)                                                                     | 53 (8.1%)                                                                       | <0.001  |
| Cardiac Arrhythmia          | 34326 (9.8%)                         | 2856 (9.0%)                                   | 751 (15%)                                                                      | 142 (22%)                                                                       | <0.001  |
| Deep Vein Thrombosis        | 4648 (1.3%)                          | 364 (1.1%)                                    | 126 (2.5%)                                                                     | 42 (6.4%)                                                                       | <0.001  |
| Pneumonia                   | 9623 (2.8%)                          | 704 (2.2%)                                    | 249 (5.0%)                                                                     | 138 (21%)                                                                       | <0.001  |
| Pulmonary Embolism          | 4296 (1.2%)                          | 388 (1.2%)                                    | 99 (2.0%)                                                                      | 32 (4.9%)                                                                       | <0.001  |
| Renal Failure               | 22488 (6.4%)                         | 1822 (5.8%)                                   | 588 (12%)                                                                      | 180 (27%)                                                                       | <0.001  |
| Respiratory Failure         | 18862 (5.4%)                         | 1338 (4.2%)                                   | 448 (8.9%)                                                                     | 228 (35%)                                                                       | <0.001  |
| Sepsis                      | 10244 (2.9%)                         | 764 (2.4%)                                    | 271 (5.4%)                                                                     | 151 (23%)                                                                       | <0.001  |
| Urinary Tract Infection     | 9662 (2.8%)                          | 791 (2.5%)                                    | 214 (4.3%)                                                                     | 39 (6.0%)                                                                       | <0.001  |

442

443 **Supplemental Table 7.** Multivariable regression assessing the impact of COVID-19  
 444 disease severity on composite and specific 30-day postoperative adverse outcomes. All  
 445 models adjusted for age, sex, race and ethnicity, smoking status, and relative risk of  
 446 surgery.  
 447

|                                               | <b>Mild<br/>(N = 31,677)</b> | <b>Moderate<br/>(N = 5,009)</b> | <b>Severe<br/>(N = 655)</b> |
|-----------------------------------------------|------------------------------|---------------------------------|-----------------------------|
| <b>Composite 30-day postoperative outcome</b> | 0.96 [0.93-1.00]             | 1.52 [1.43-1.62]                | 4.76 [4.01-5.68]            |
| <b>Mortality</b>                              | 1.00 [0.90-1.11]             | 1.77 [1.51-2.07]                | 7.49 [5.93-9.35]            |
| <b>Composite Non-fatal Complications</b>      | 0.96 [0.93-0.99]             | 1.47 [1.38-1.57]                | 4.08 [3.44-4.84]            |
| <b>Hospital Readmission</b>                   | 0.96 [0.92-1.00]             | 1.26 [1.17-1.36]                | 1.20 [0.98-1.46]            |
| <b>Myocardial Infarction</b>                  | 0.94 [0.86-1.02]             | 1.31 [1.13-1.50]                | 2.02 [1.46-2.73]            |
| <b>Cardiac Arrhythmia</b>                     | 1.03 [0.98-1.07]             | 1.27 [1.17-1.38]                | 2.02 [1.64-2.47]            |
| <b>Deep Vein Thrombosis</b>                   | 0.87 [0.78-0.97]             | 1.37 [1.13-1.63]                | 3.01 [2.16-4.08]            |
| <b>Pneumonia</b>                              | 0.85 [0.79-0.92]             | 1.30 [1.14-1.48]                | 5.53 [4.53-6.70]            |
| <b>Pulmonary Embolism</b>                     | 1.01 [0.91-1.12]             | 1.19 [0.96-1.45]                | 2.56 [1.75-3.60]            |
| <b>Renal Failure</b>                          | 0.93 [0.88-0.98]             | 1.28 [1.17-1.40]                | 3.24 [2.69-3.89]            |
| <b>Respiratory Failure</b>                    | 0.82 [0.77-0.87]             | 1.20 [1.08-1.32]                | 5.71 [4.81-6.76]            |
| <b>Sepsis</b>                                 | 0.85 [0.78-0.91]             | 1.33 [1.17-1.51]                | 5.91 [4.88-7.12]            |
| <b>Urinary Tract Infection</b>                | 0.93 [0.86-1.00]             | 1.25 [1.08-1.43]                | 1.72 [1.22-2.36]            |

448

449

450

451 **Supplemental Table 8.** Comparison of specific 30-day postoperative adverse events  
452 based on vaccination in patients with COVID-19.

| <b>Postoperative Complications</b> | <b>Non-Fully Vaccinated (N = 31,973), No. (%)</b> | <b>Fully Vaccinated (N = 5,381), No. (%)</b> | <b>P value</b> |
|------------------------------------|---------------------------------------------------|----------------------------------------------|----------------|
| <b>Mortality</b>                   | 585 (1.8%)                                        | 81 (1.5%)                                    | 0.11           |
| <b>LOS</b>                         | 2 (0, 6)                                          | 3 (0, 6)                                     | 0.014          |
| <b>Hospital Readmission</b>        | 3644 (11%)                                        | 604 (11%)                                    | 0.73           |
| <b>Any Non-Fatal Complication</b>  | 7072 (22%)                                        | 1185 (22%)                                   | 0.89           |
| <b>Acute Myocardial Infarction</b> | 892 (2.8%)                                        | 128 (2.4%)                                   | 0.10           |
| <b>Cardiac Arrhythmia</b>          | 3172 (9.9%)                                       | 580 (11%)                                    | 0.056          |
| <b>Deep Vein Thrombosis</b>        | 465 (1.5%)                                        | 67 (1.2%)                                    | 0.26           |
| <b>Pneumonia</b>                   | 970 (3.0%)                                        | 123 (2.3%)                                   | 0.003          |
| <b>Pulmonary Embolism</b>          | 434 (1.4%)                                        | 85 (1.6%)                                    | 0.22           |
| <b>Renal Failure</b>               | 2245 (7.0%)                                       | 347 (6.4%)                                   | 0.13           |
| <b>Respiratory Failure</b>         | 1792 (5.6%)                                       | 225 (4.2%)                                   | <0.001         |
| <b>Sepsis</b>                      | 1042 (3.3%)                                       | 146 (2.7%)                                   | 0.039          |
| <b>Urinary Tract Infection</b>     | 873 (2.7%)                                        | 172 (3.2%)                                   | 0.061          |

453

454

455

456
